# Supplementary material
Source: PubMed Central journal article supplement (PMC2929103)
Supplement: tpc.110.073973_1.pdf [file tpc.110.073973_1.pdf]

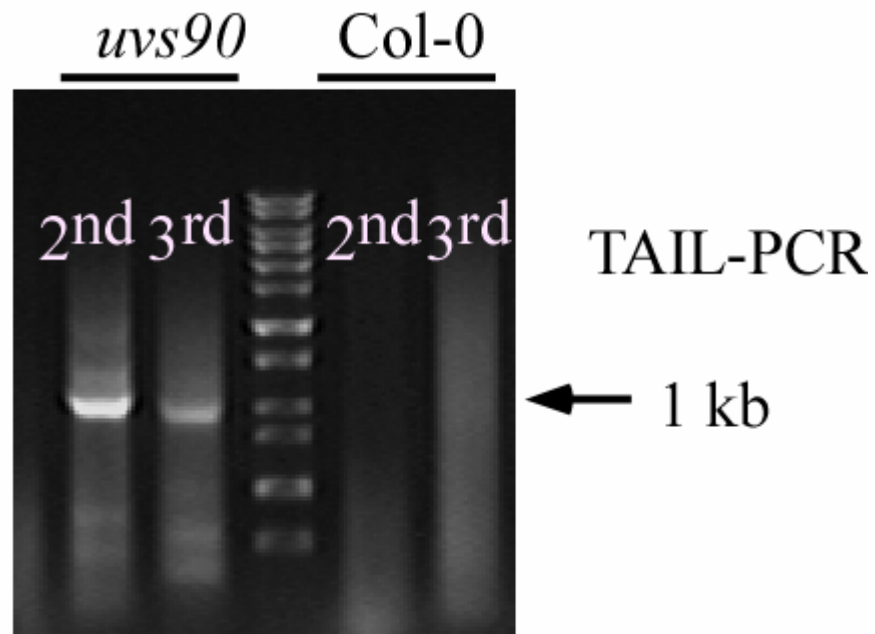

**Supplemental Figure 1. *uvs90* gene cloning**

The T-DNA insertion in *uvs90* was identified using thermal asymmetric interlaced (TAIL)-PCR. Three rounds of amplification were performed; the second (2<sup>nd</sup>) and third (3<sup>rd</sup>) round products were analyzed using agarose electrophoresis. Amplification in wild type (Col-0) was included as a control.

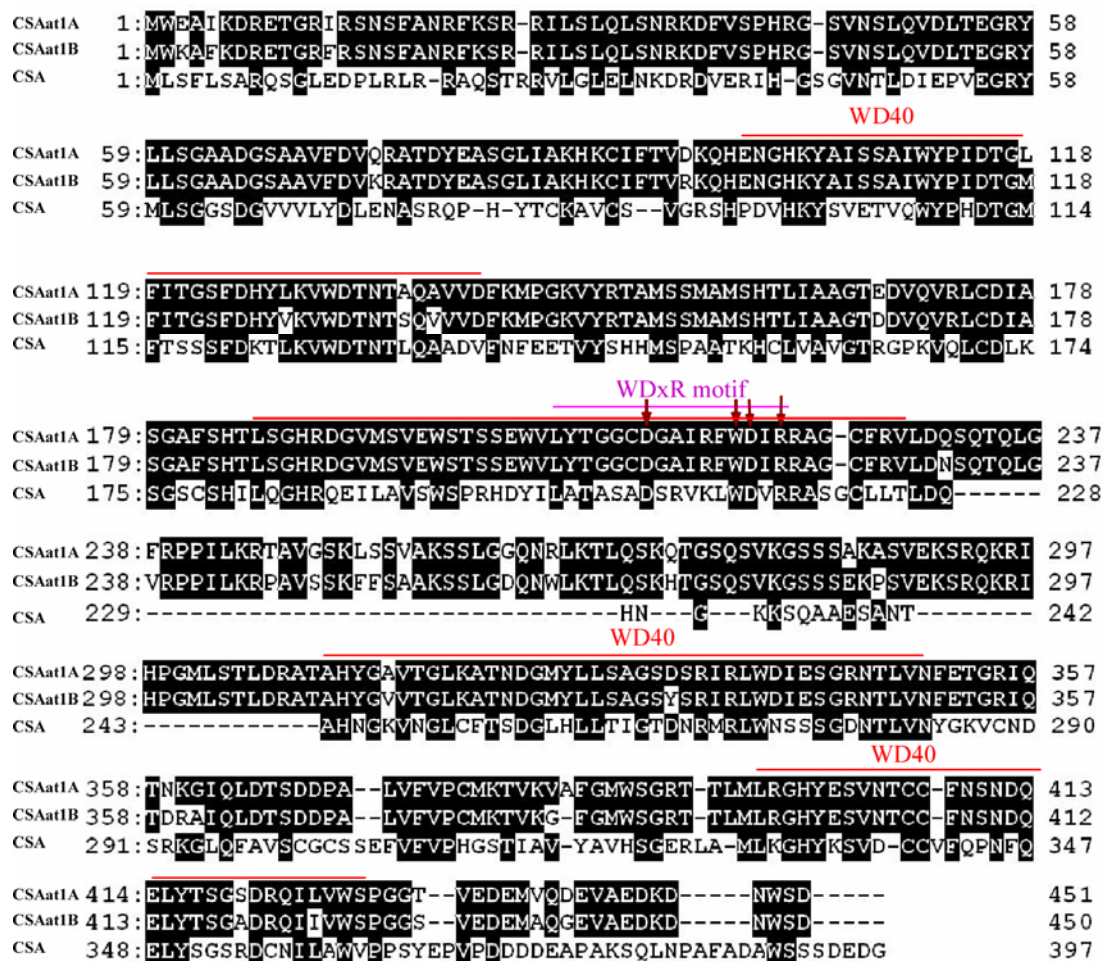

### Supplemental Figure 2. Sequence alignment of CSA, CSAat1A and CSAat1B

The WD40 domain, red line; the WDxR motif in the WD40 domain, purple line; “x”, an undefined amino acid; the D212, W218, D219 and R221 amino acids within the WDxR motif, arrows. CSA, human Cockayne syndrome gene A; CSAat1A and CSAat1B, *Arabidopsis* CSA-like proteins.

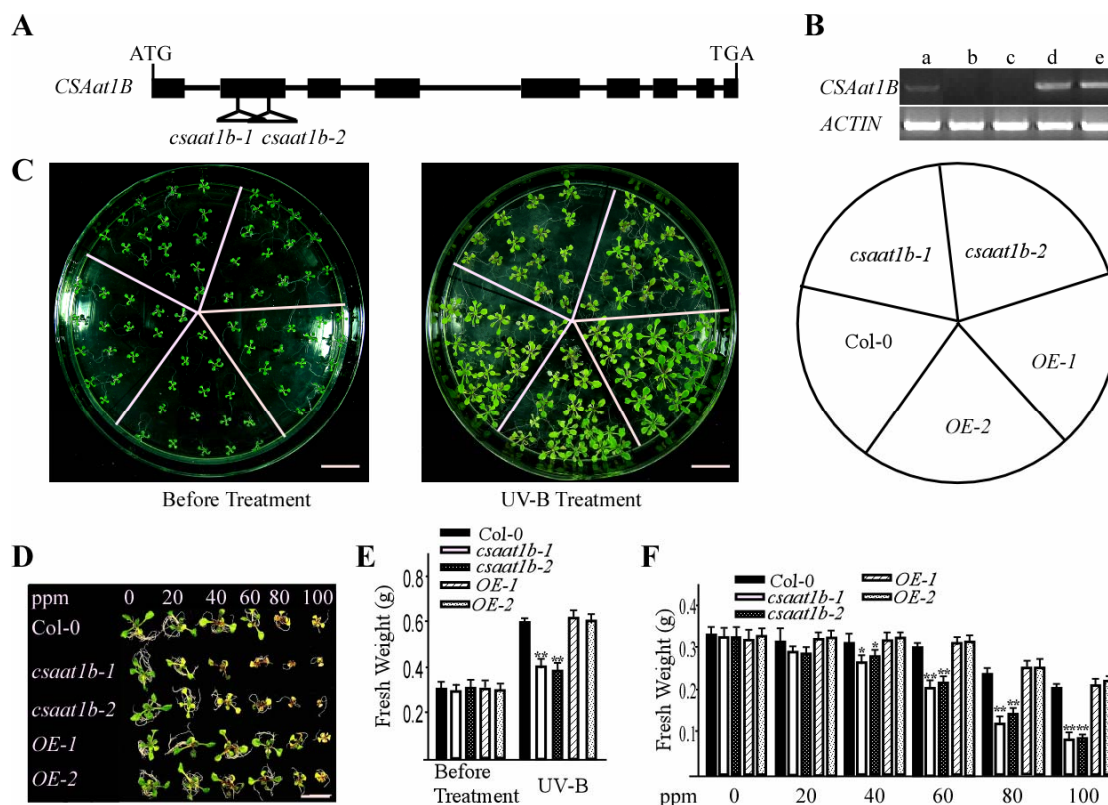

**Supplemental Figure 3. *csaat1b* knockout mutants are sensitive to UV-B and MMS**

(A) Gene structure of *CSAat1B* with T-DNA insertion sites found in *csaat1b* mutants. Exons, filled black rectangles; introns, solid lines.

(B) Expression of *CSAat1B* in wild-type and *csaat1b* mutant seedlings, and mutant seedlings over-expressing (OE) *CSAat1B*; RT-PCR products after 30 cycles with gene-specific primers and *ACTIN* as a loading control. a, Col-0; b, *csaat1b-1*; c, *csaat1b-2*; d, *35Spro-CSAat1B-Flag* in *csaat1b-1* (*OE-1*); e, *35Spro-CSAat1B-Flag* in *csaat1b-2* (*OE-2*).

(C) Twelve-day-old wild-type, *csaat1b* mutants and *CSAat1B* OE seedlings were treated with UV-B ( $130 \mu\text{mol m}^{-2} \text{s}^{-1}$ ) for 30 min. After treatment, plants were transferred to a growth chamber for 5 d and then photographed. Bars=1 cm.

(D) Six-day-old wild-type, *csaat1b* mutant and *CSAat1B* OE seedlings were treated with the indicated concentrations of MMS. Photographs were taken 10 d after treatment. Bar=1 cm.

(E) The fresh weight of 20 seedlings from each group shown in C was measured. All

data represent means  $\pm$  SE of at least five replicate experiments (Student' s t test, \*\*P<0.01).

**(F)** The fresh weight of 10 seedlings from each group shown in D was measured. All data represent means  $\pm$  SE of at least five replicate experiments (Student' s t test, \*P < 0.05 and \*\*P<0.01).

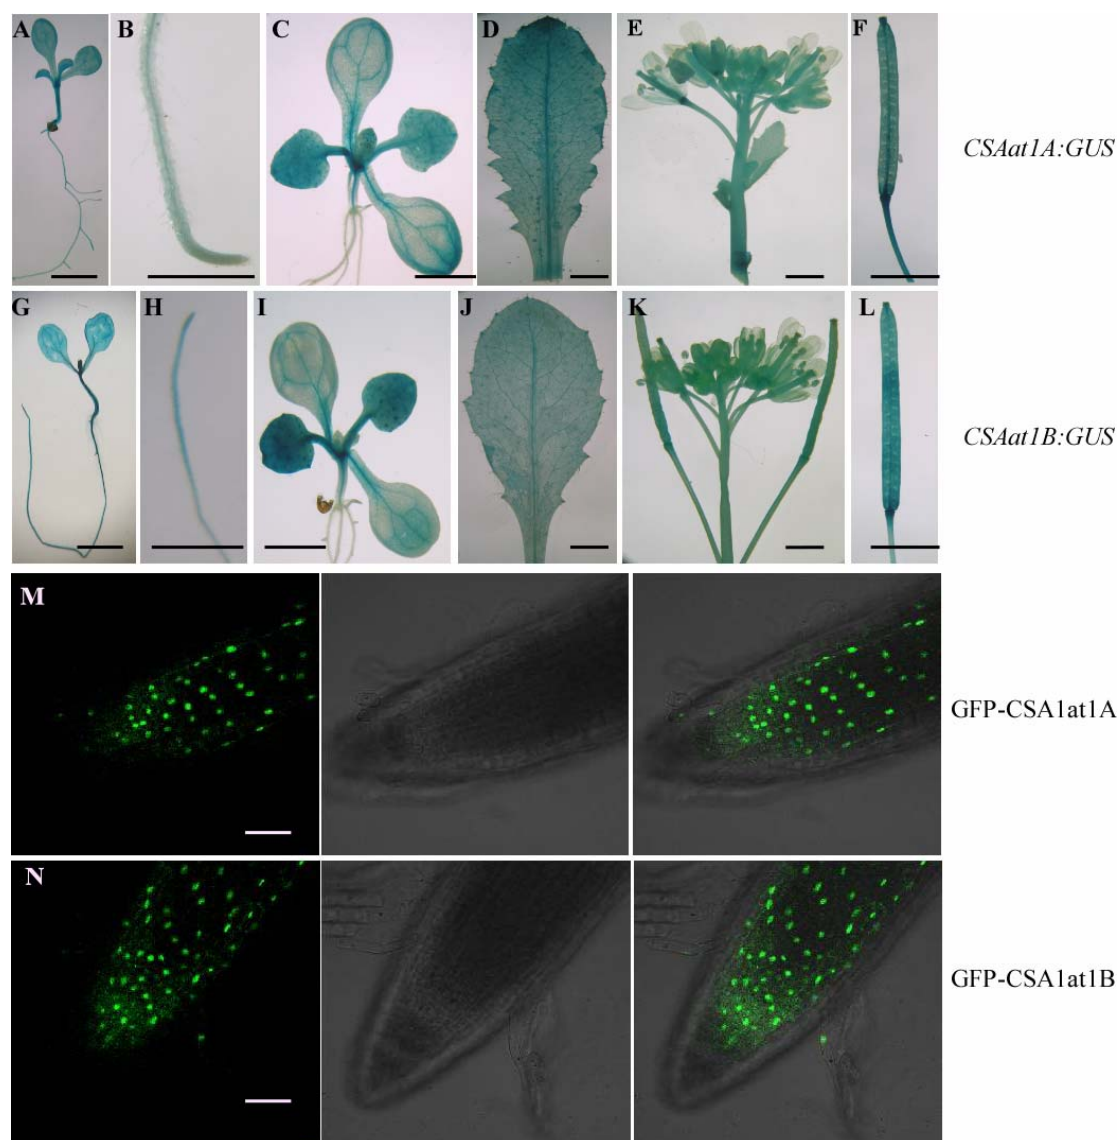

**Supplemental Figure 4. Tissue-specific expression and subcellular localization of CSAat1A and B**

Expression patterns of the *GUS* reporter gene in *CSAat1A::* and *B::GUS* transgenic *Arabidopsis*. *GUS* activity was examined in eight-day-old seedlings (A, G), the roots and (B, H), shoots of fifteen-day-old seedlings (C, I), forty-day-old rosette leaves (D, J), fifty-day-old flowers (E, K), fifty-day-old siliques (F, L). Bars=0.3 cm.

(M-N) GFP-*CSAat1A* and B localization. Seven-day-old transgenic *35Spro-GFP-CSAat1A* (M) and *35Spro-GFP-CSAat1B* (N) seedlings were examined. Left panels, confocal GFP images; middle panels, bright-field images; right panels, combined bright-field and GFP images. Bars=20  $\mu$ m.

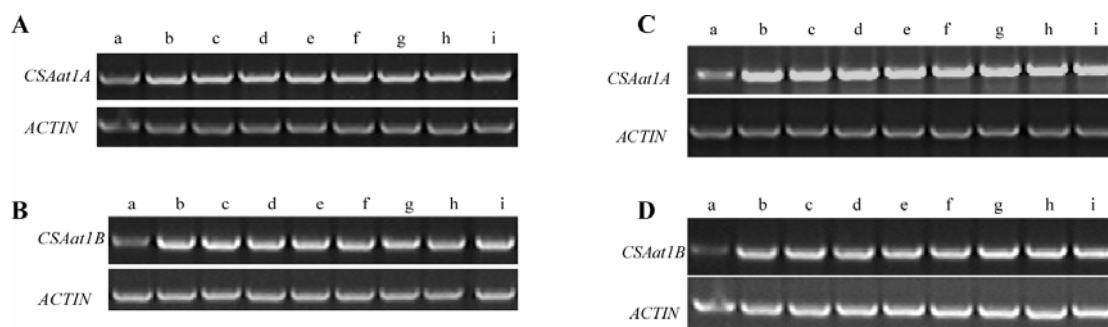

**Supplemental Figure 5. Expression of CSAat1A and B point mutations in transgenic *Arabidopsis* plants**

(A-B) a, expression of *CSAat1A* or *B* in wild type; b, expression of *35Spro-CSAat1A*- or *B-Flag*; c, *35Spro-CSAat1A<sup>D212</sup>*- or *B<sup>D212</sup>-Flag*; d, *35Spro-CSAat1A<sup>W218A</sup>*- or *B<sup>W218A</sup>-Flag*; e, *35Spro-CSAat1A<sup>D219A</sup>*- or *B<sup>D219A</sup>-Flag*; f, *35Spro-CSAat1A<sup>R221A</sup>*- or *B<sup>R221A</sup>-Flag*; g, *35Spro-CSAat1A<sup>L206A</sup>*- or *B<sup>L206A</sup>-Flag*; h, *35Spro-CSAat1A<sup>T208A</sup>*- or *B<sup>T208A</sup>-Flag* and i, *35Spro-CSAat1A<sup>R216A</sup>*- or *B<sup>R216A</sup>-Flag* in their corresponding mutants. RT-PCR products after 30 cycles with gene-specific primers and *ACTIN* as a loading control. Three replicate experiments were performed.

(C-D) a, expression of *CSAat1A* or *B* in wild type; b, expression of *35Spro-CSAat1A* or *B-Flag*; c, *35Spro-CSAat1A<sup>D212AW218A</sup>*- or *B<sup>D212AW218A</sup>-Flag*; d, *35Spro-CSAat1A<sup>D212AD219A</sup>*- or *B<sup>D212AD219A</sup>-Flag*; e, *35Spro-CSAat1A<sup>D212AR221A</sup>*- or *B<sup>D212AR221A</sup>-Flag*; f, *35Spro-CSAat1A<sup>D212AL206A</sup>*- or *B<sup>D212AL206A</sup>-Flag*; g, *35Spro-CSAat1A<sup>D212AW218AD219A</sup>*- or *B<sup>D212AW218AD219A</sup>-Flag*; h, *35Spro-CSAat1A<sup>W218AD219AR221A</sup>*- or *B<sup>W218AD219AR221A</sup>-Flag*, and i, *35Spro-CSAat1A<sup>D212AW218AD219AR221A</sup>*- or *B<sup>D212AW218AD219AR221A</sup>-Flag* in their corresponding mutants. RT-PCR products after 30 cycles with gene-specific primers and *ACTIN* as a loading control. Three replicate experiments were performed.



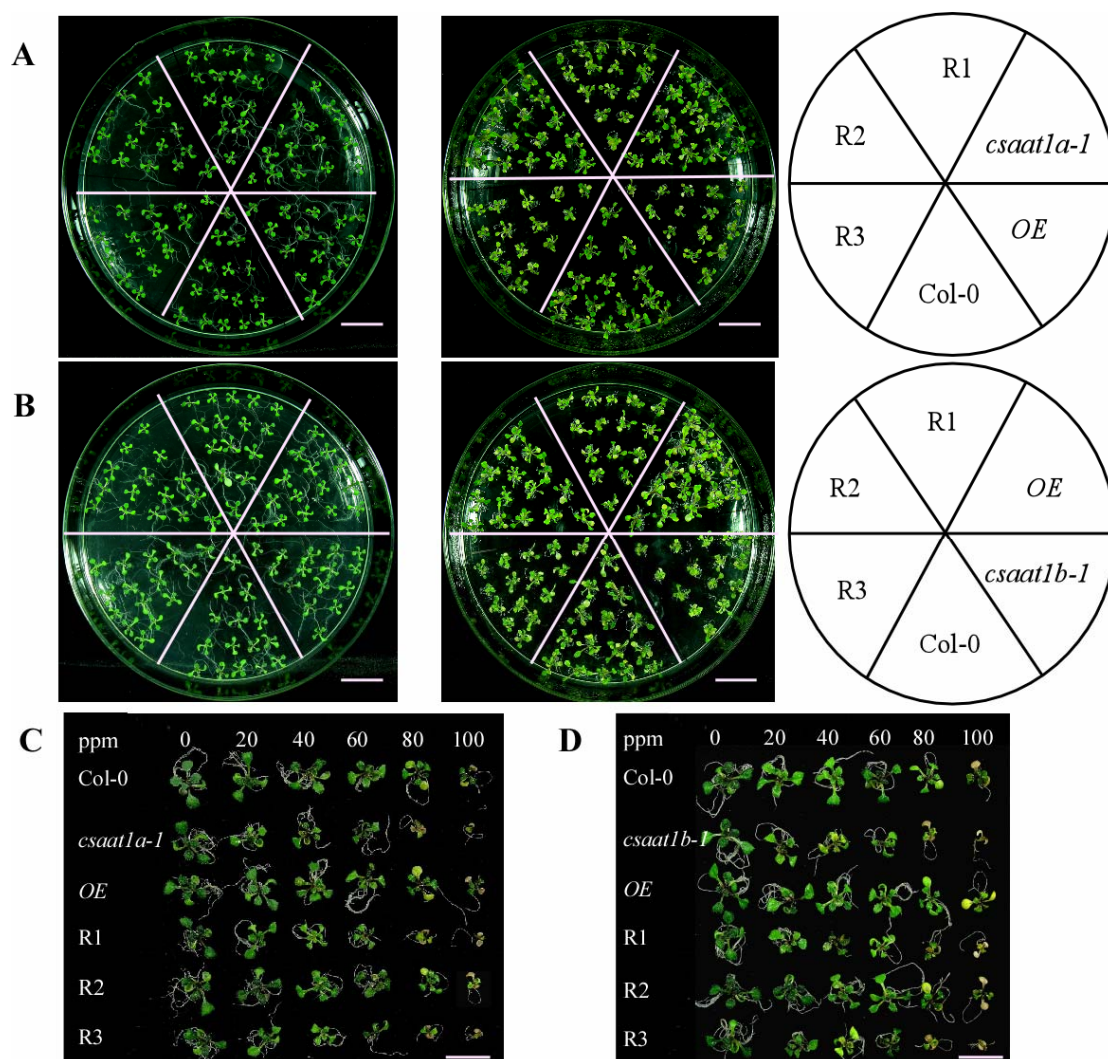

**Supplemental Figure 6. Expression of the R2 region of *CSAat1A* or *B* in *csaat1a* or *b* mutants partially rescues their UV-B- and MMS-sensitive phenotypes**

**(A-B)** UV-B sensitivity of transgenic plants harboring different fragments of *CSAat1A* (A) and *CSAat1B* (B). Col-0, twelve-day-old; *csaat1a-* or *b-*; OE, *35Spro-CSAat1A-* or *B-Flag*; R1, *35Spro-CSAat1A-* or *B-R1-Flag*; R2, *35Spro-CSAat1A-* or *B-R2-Flag*; R3, *35Spro-CSAat1A-* or *B-R3-Flag* in the *csaat1a* or *b* backgrounds were treated with UV-B ( $130 \mu\text{mol m}^{-2} \text{s}^{-1}$ ) for 30 min. After treatment, plants were transferred to a growth chamber for 5 d and then photographed. Bars=1 cm.

**(C-D)** Six-day-old transgenic plants as in A and B were treated with the indicated concentrations of MMS. Photographs were taken 10 d after treatment. Bars=1 cm.

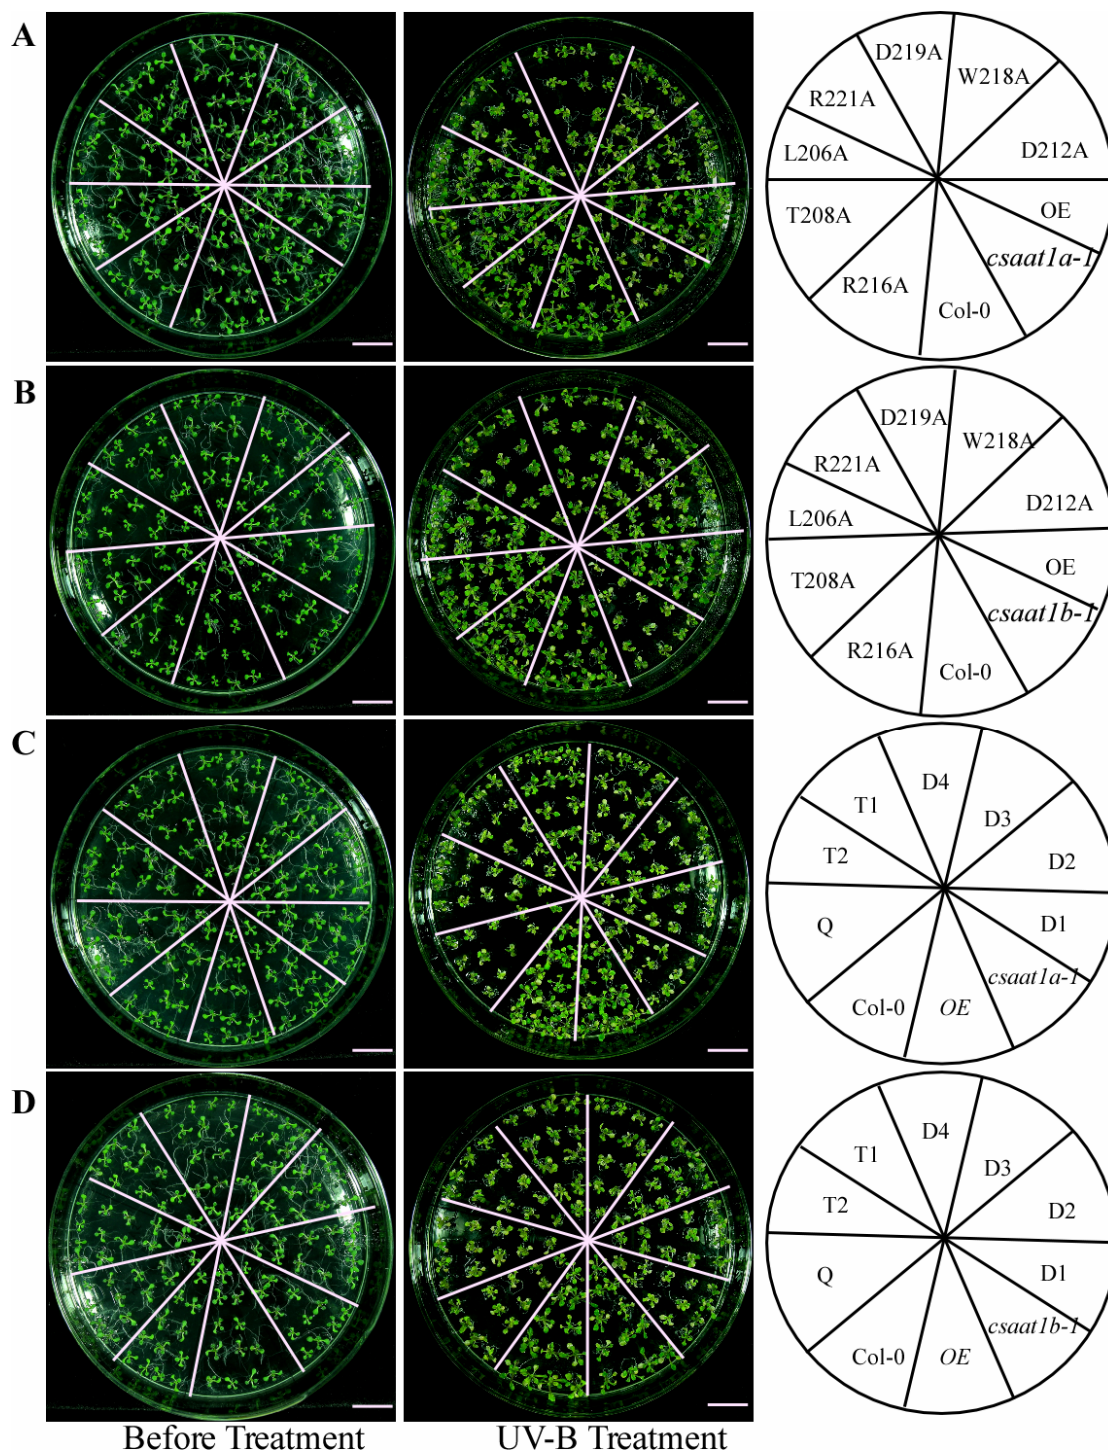

**Supplemental Figure 7. Mutations in the WDxR motif of *CSAat1A* and *B* impair UV-B tolerance in *Arabidopsis***

(A-B) Effect of single amino-acid mutations on *csaat1a* (A) and *csaat1b* (B) UV-B sensitivity. Col-0, wild type; *csaat1a* or *b*; OE, 35Spro-*CSAat1A*- or *B*-Flag; D212A, 35Spro-*CSAat1A*<sup>D212A</sup>- or *B*<sup>D212A</sup>-Flag; W218A, 35Spro-*CSAat1A*<sup>W218A</sup>- or *B*<sup>W218A</sup>-Flag; D219A, 35Spro-*CSAat1A*<sup>D219A</sup>- or *B*<sup>D219A</sup>-Flag; R221A,



35Spro-CSAat1A<sup>R221A</sup> - or B<sup>R221A</sup>-Flag; L206A, 35Spro-CSAat1A<sup>L206A</sup> - or B<sup>L206A</sup>-Flag; T208A, 35Spro-CSAat1A<sup>T208A</sup> - or B<sup>T208A</sup>-Flag; R216A, 35Spro-CSAat1A<sup>R216A</sup> - or B<sup>R216A</sup>-Flag transgenic plants in the *csaat1a* or *b* backgrounds were treated with UV-B as described in Figure 7. Bars=1 cm.

**(C-D)** Effect of multiple amino-acid mutations on *csaat1a* (C) and *csaat1b* (D) UV-B sensitivity. Col-0, wild type; OE, 35Spro-CSAat1A or B-Flag; *csaat1a* or *b*; D1, 35Spro-CSAat1A<sup>D212AW218A</sup> - or B<sup>D212AW218A</sup>-Flag; D2, 35Spro-CSAat1A<sup>D212AD219A</sup> - or B<sup>D212AD219A</sup> -Flag; D3, 35Spro-CSAat1A<sup>D212AR221A</sup> - or B<sup>D212AR221A</sup>-Flag; D4, 35Spro-CSAat1A<sup>D212AL206A</sup> - or B<sup>D212AL206A</sup>-Flag; T1, 35Spro-CSAat1A<sup>D212AW218AD219A</sup> - or B<sup>D212AW218AD219A</sup>-Flag; T2, 35Spro-CSAat1A<sup>W218AD219AR221A</sup> - or B<sup>W218AD219AR221A</sup>-Flag and Q, 35Spro-CSAat1A<sup>D212AW218AD219AR221A</sup> - or B<sup>D212AW218AD219AR221A</sup>-Flag were treated with UV-B as described in Figure 7. Bars=1 cm.

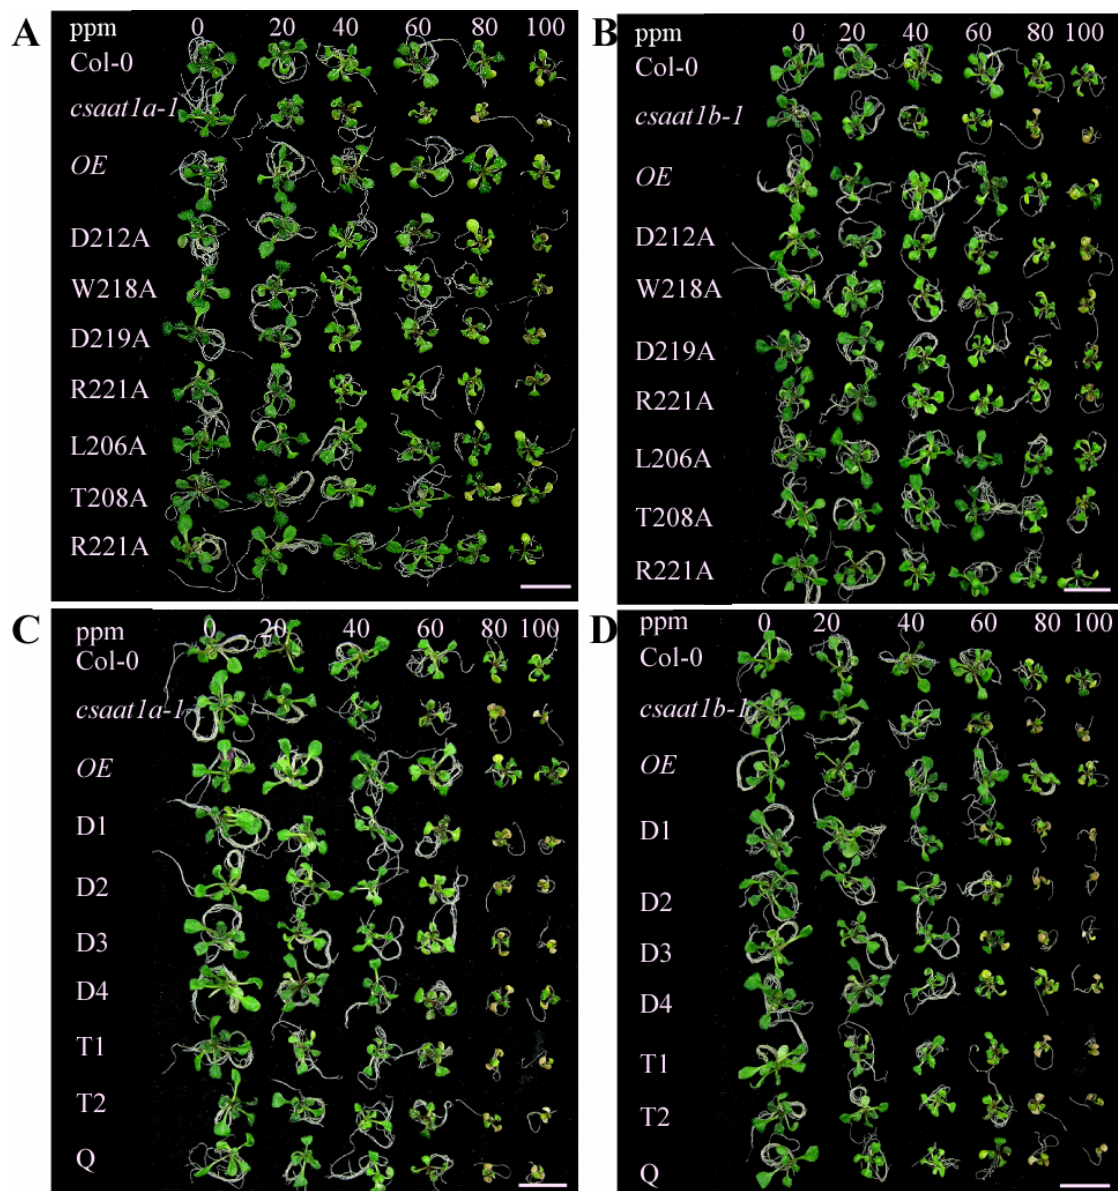

**Supplemental Figure 8. Mutations in the WDxR motif impair MMS tolerance in *Arabidopsis***

(A-B) Effect of single amino-acid mutation on *csaat1a* (A) and *csaat1b* (B) MMS sensitivity. Col-0, six-day-old wild type; *csaat1a* or *b*; OE, 35*Spro*-*CSAat1A*- or *B*-*Flag*; D212A, 35*Spro*-*CSAat1A*<sup>D212A</sup>- or *B*<sup>D212A</sup>-*Flag*; W218A, 35*Spro*-*CSAat1A*<sup>W218A</sup>- or *B*<sup>W218A</sup>-*Flag*; D219A, 35*Spro*-*CSAat1A*<sup>D219A</sup>- or *B*<sup>D219A</sup>-*Flag*; R221A, 35*Spro*-*CSAat1A*<sup>R221A</sup>- or *B*<sup>R221A</sup>-*Flag*; L206A, 35*Spro*-*CSAat1A*<sup>L206A</sup>- or *B*<sup>L206A</sup>-*Flag*; T208A, 35*Spro*-*CSAat1A*<sup>T208A</sup>- or *B*<sup>T208A</sup>-*Flag*; R216A, 35*Spro*-*CSAat1A*<sup>R216A</sup>- or *B*<sup>R216A</sup>-*Flag* transgenic plants in *csaat1a* or *b* background were treated with the indicated concentrations of MMS. Bars=1 cm.

**(C-D)** Effect of multiple amino-acid mutations on *csaat1a* (C) and *csaat1a* (D) MMS sensitivity. Col-0, six-day-old wild type; *csaat1a* or *b*; OE, 35Spro-*CSAat1A*- or *B*-Flag; D1, 35Spro-*CSAat1A*<sup>D212AW218A</sup>- or *B*<sup>D212AW218A</sup>-Flag; D2, 35Spro-*CSAat1A*<sup>D212AD219A</sup>- or *B*<sup>D212AD219A</sup>-Flag; D3, 35Spro-*CSAat1A*<sup>D212AR221A</sup>- or *B*<sup>D212AR221A</sup>-Flag; D4, 35Spro-*CSAat1A*<sup>L206AD212A</sup>- or *B*<sup>AL206AD212A</sup>-Flag; T1, 35Spro-*CSAat1A*<sup>D212AW218AD219A</sup>- or *B*<sup>D212AW218AD219A</sup>-Flag; T2, 35Spro-*CSAat1A*<sup>W218AD219AR221A</sup>- or *B*<sup>W218AD219AR221A</sup>-Flag and Q, 35Spro-*CSAat1A*<sup>D212AW218AD219AR221A</sup>- or *B*<sup>D212AW218AD219AR221A</sup>-Flag transgenic plants in the *csaat1a* or *b* background were treated with the indicated concentrations of MMS. Bars=1 cm.

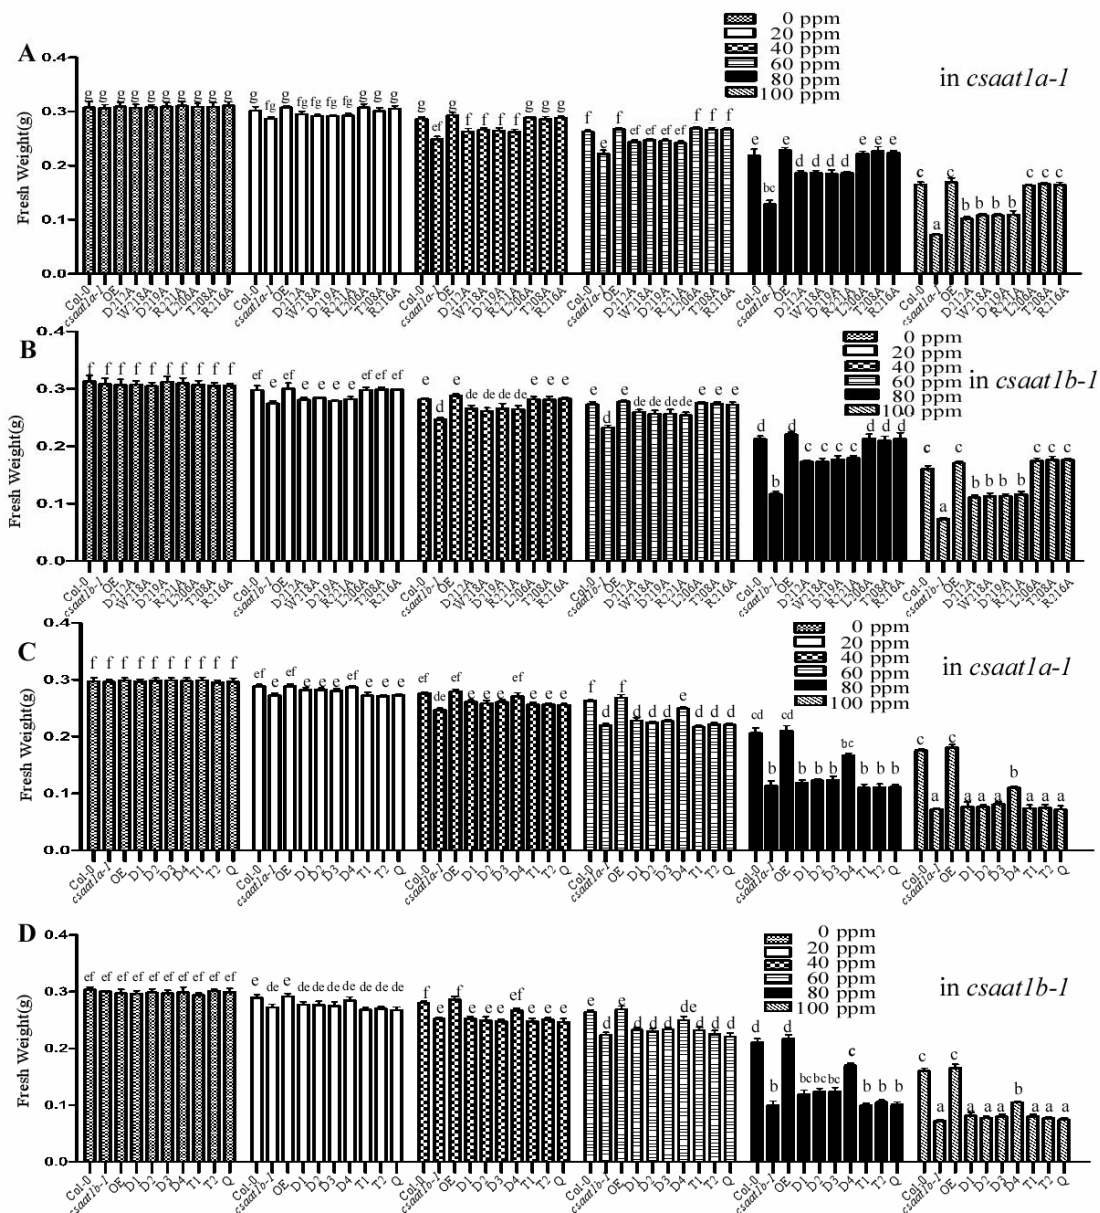

**Supplemental Figure 9. Fresh weight of transgenic plants expressing different point mutations in the WDxR motif of CSAat1A or B after MMS treatment**  
**(A-B)** Col-0, wild type; *csaat1a* or *b*; OE, *35Spro-CSAat1A*- or *B-Flag*; D212A, *35Spro-CSAat1A<sup>D212A</sup>*- or *B<sup>D212A</sup>-Flag*; W218A, *35Spro-CSAat1A<sup>W218A</sup>*- or *B<sup>W218A</sup>-Flag*; D219A, *35Spro-CSAat1A<sup>D219A</sup>*- or *B<sup>D219A</sup>-Flag*; R221A, *35Spro-CSAat1A<sup>R221A</sup>*- or *B<sup>R221A</sup>-Flag*; L206A, *35Spro-CSAat1A<sup>L206A</sup>*- or *B<sup>L206A</sup>-Flag*; T208A, *35Spro-CSAat1A<sup>T208A</sup>*- or *B<sup>T208A</sup>-Flag*; R216A, *35Spro-CSAat1A<sup>R216</sup>*- or *B<sup>R216</sup>-Flag* transgenic plants in the *csaat1a* or *b* background were treated with the indicated concentrations of MMS. The fresh weight of 10 seedlings in each group was measured. All data represent means  $\pm$  SE of at least five replicate experiments.



Significant differences ( $P \leq 0.05$ , Student's t test) are indicated by different lowercase letters.

(C-D) Col-0, wild type; *csaat1a* or *b*; OE, *35Spro-CSAat1A*- or *B-Flag*; D1, *35Spro-CSAat1A*<sup>D212AW218A</sup>- or *B*<sup>D212AW218A</sup>-*Flag*; D2, *35Spro-CSAat1A*<sup>D212AD219A</sup>- or *B*<sup>D212AD219A</sup>-*Flag*; D3, *35Spro-CSAat1A*<sup>D212AR221A</sup>- or *B*<sup>D212AR221A</sup>-*Flag*; D4, *35Spro-CSAat1A*<sup>L206AD212A</sup>- or *B*<sup>L206AD212A</sup>-*Flag*; T1, *35Spro-CSAat1A*<sup>D212AW218AD219A</sup>- or *B*<sup>D212AW218AD219A</sup>-*Flag*; T2, *35Spro-CSAat1A*<sup>W218AD219AR221A</sup>- or *B*<sup>W218AD219AR221A</sup>-*Flag*; and Q, *35Spro-CSAat1A*<sup>D212AW218AD219AR221A</sup>- or *B*<sup>D212AW218AD219AR221A</sup>-*Flag* transgenic plants in the *csaat1a* or *b* background were treated with the indicated concentrations of MMS. The fresh weight of 10 seedlings in each group was measured. All data represent means  $\pm$  SE of at least five replicate experiments. Significant differences ( $P \leq 0.05$ , Student's t test) are indicated by different lowercase letters.

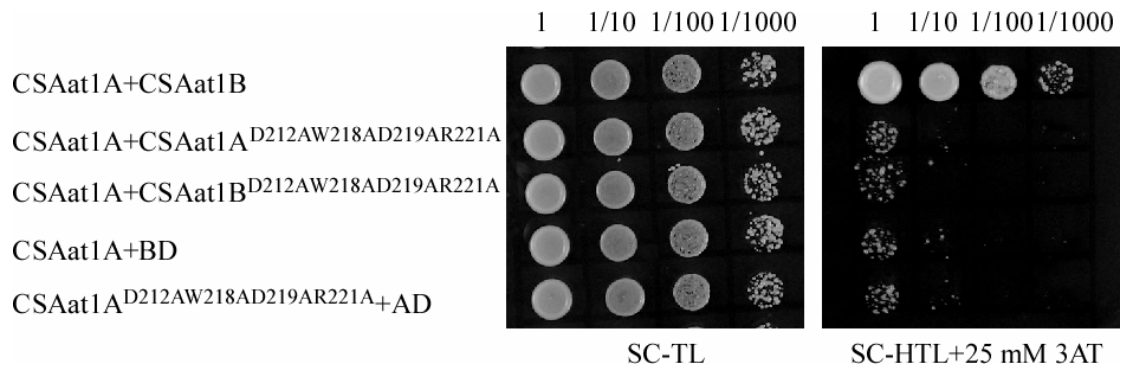

**Supplemental Figure 10. CSAat1A<sup>D212AW218AD219AR221A</sup> does not interact with CSAat1A or CSAat1B**

The *pGADT7-CSA1at1A* was co-transformed with *pGBKT7-CSAat1A/B<sup>D212AW218AD219AR221A</sup>* into yeast. Growth of the transformed yeast was assayed on media minus Trp and Leu (left panel) or minus Trp, Leu, and His (right panel) with 25 mM 3-amino-1, 2, 4-triazole. Interaction of CSAat1A and CSAat1B was included as a control. Columns in each panel represent serial decimal dilutions. BD, binding domain.

**Supplemental Table 1. Primers used for RT-PCR and homozygous mutant identification**

| Primer name          | Sequence                                |
|----------------------|-----------------------------------------|
| LB1                  | 5'-ATACGACGGATCGTAATTTGTC-3'            |
| LB2                  | 5'-TAATAACGCTGCGGACATCTAC-3'            |
| LB3                  | 5'-TTGACCATCATACTCATTGCTG-3'            |
| AD                   | 5'-NGTCGASWGANAWGAA-3'                  |
| <i>uvs90</i> T-DNAF  | 5'-TTGGCGAAGGAATTGGAACG-3'              |
| <i>uvs90</i> T-DNAR  | 5'-CCAGAGTTGTCCTCCCAATC-3'              |
| salk_024816LP        | 5'-CCACGAAAATCAGAAGACGAG-3'             |
| salk_024816RP        | 5'-TATACAAAACCCACTCGCTGG-3'             |
| Salk_151258LP        | 5'-GCTGCTGGAAGTGAAGATGTC-3'             |
| Salk_151258RP        | 5'-CCAGCAGATGCTGCCTATAAC-3'             |
| Salk_152568LP        | 5'-CCGGAAAATAAATCCAAAGATG-3'            |
| Salk_152568RP        | 5'-TAATGTGTGAGAGAATGCCCC-3'             |
| Salk_144623LP        | 5'-TGGTTTGGTTTTGTTCTTTTCG-3'            |
| Salk_144623RP        | 5'-CATGACAATTTGGTAGCCTGG-3'             |
| LBa1                 | 5'-TGGTTCACGTAGTGGGCCATCG-3'            |
| LBb1                 | 5'-GCGTGGACCGCTTGCTGCAACT-3'            |
| <i>DDB1A</i> T-DNAF  | 5'-AAAAGCTTCCTTGAGCTGTCC-3'             |
| <i>DDB1A</i> T-DNAR  | 5'-ATTTGCTTACCCACAAGGAC-3'              |
| <i>CSAat1A</i> cDNAF | 5'-CGGGATCCATGTGGGAGGCTATCAAAGAC-3',    |
| <i>CSAat1A</i> cDNAR | 5'-GGGGTACCTCAGTCGCTCCAATTGTCTTT        |
| <i>CSAat1B</i> cDNAF | 5'-CGGGATCCATGTGGAAGGCTTTTAA-3'         |
| <i>CSAat1B</i> cDNAR | 5'-GGGGTACCTCAGTCGCTCCAGTTGTCT-3'       |
| <i>CSAat1A</i> PF    | 5'-AACTGCAGATGATTGGAACATACATTTGTC-3'    |
| <i>CSAat1A</i> PR    | 5'-CCGGAATTCATAATTTTGCTATATTGT-3'       |
| <i>CSAat1B</i> PF    | 5'-CCGGAATTCATTCGGATCAATGCCAGAC-3'      |
| <i>CSAat1B</i> PR    | 5'-ACGCGTCGACAAGCCTTCCACATTCTCCTA-3'    |
| <i>CSAat1A</i> ADF   | 5'-CGCGGATCCATGTGGGAGGCTATCAAAGAC-3'    |
| <i>CSAat1A</i> ADR   | 5'-CGAGCTCTCAGTCGCTCCAATTGTCTTTATC-3'   |
| <i>CSAat1B</i> ADF   | 5'-TCCCCGGGATGTGGAAGGCTTTTAAAGAC-3'     |
| <i>CSAat1B</i> ADR   | 5'-CGAGCTCTCAGTCGCTCCAGTTGTCTTTAT       |
| <i>DDB1A</i> BDF     | 5'-CCGGAATTCATGAGCTCATGGAACACTACGTTG-3' |
| <i>DDB1A</i> BDR     | 5'-CGCGGATCCTCAGTGAAGCCTAGTGAGTTC-3'    |
| <i>CSAat1A</i> RTF   | 5'-TAGGGCTTTGGAGATTCGAG-3'              |
| <i>CSAat1A</i> RTR   | 5'-GGTCTTCGCCGAATAAAGAG-3'              |
| <i>CSAat1B</i> RTF   | 5'-GCTGGACAAGGGAGATTCGAGC-3'            |
| <i>CSAat1B</i> RTR   | 5'-TGGCTGCGATGGGAACACATCT-3'            |
| <i>ACTIN F</i>       | 5'-GTCGTACAACCGGTATTGTG-3'              |
| <i>ACTIN R</i>       | 5'-GAGCTGGTCTTTGAGGTTTC-3'              |

|            |                                 |
|------------|---------------------------------|
| At1g29230T | 5'-ATGGCTCAAGCCTTGGCTCAACCA-3'  |
| At1g29230N | 5'-TGTAATCCGAGTATCCGGATTTCGT-3' |
| At2g30360T | 5'-ATGCCAGAGATCGAGATTGCCGCC-3'  |
| At2g30360N | 5'-CACAGCTTCTAGTGACGATTCCAC-3'  |
| At3g23000T | 5'-GTCCCTGAAACCTCTCTTCAGAAA-3'  |
| At3g23000N | 5'-AAACTCAGAAGTCTCTAGAGACTT-3'  |
| At4g14580T | 5'-ATGGAATCTCCATATCCAAAATCA-3'  |
| At4g14580N | 5'-AGACTGAAACTCCGAAATCTCTAG-3'  |
| At5g10930T | 5'-ATTGCACTTCTTCTTCTTCTT-3'     |
| At5g10930N | 5'-TCCGCTCTGAAAATCTTCCGATAC-3'  |



**Supplemental Table 2. Primers used for plasmid constructions**

| Plasmids                                                                     | Forward Primers                                        | Reverse Primers                                          |
|------------------------------------------------------------------------------|--------------------------------------------------------|----------------------------------------------------------|
| pCAMBIA1307-C<br>SAat1A-flag                                                 | 5'-CGAGCTCATGTGGGAGGCT<br>ATCAAAGAC-3'                 | 5'-CGCGGATCCGTCGCTCCAA<br>TTGTCTTTATC-3'                 |
| pCAMBIA1307-C<br>SAat1A <sup>L206A</sup> -flag                               | 5'-TCCAGCGAGTGGGTTCGCT<br>ATACTGGGGGTTG-3'             | 5'-CAACCCCCAGTATACGCAA<br>CCCCTCGCTGGA-3'                |
| pCAMBIA1307-C<br>SAat1A <sup>T208A</sup> -flag                               | 5'-GGGTTTTGTATGCTGGGGG<br>TTGTGATGGTGCA-3'             | 5'-TGCACCATCACAACCCCA<br>GCATACAAAACCC-3'                |
| pCAMBIA1307-C<br>SAat1A <sup>D212A</sup> -flag                               | 5'-ACTGGGGGTTGTGCTGGTG<br>CAATACGTTTCTG-3'             | 5'-CAGAAACGTATTGCACCAG<br>CACAACCCCACTG-3'               |
| pCAMBIA1307-C<br>SAat1A <sup>R216A</sup> -flag                               | 5'-TGTGATGGTGCAATAGCAT<br>TCTGGGACATT-3'               | 5'-AATGTCCCAGAATGCTATTG<br>CACCATCACA-3'                 |
| pCAMBIA1307-C<br>SAat1A <sup>W218A</sup> -flag                               | 5'-CAATACGTTTCGCGGACAT<br>TAGACGGGCTGGT-3'             | 5'-ACCAGCCCGTCTAATGTCC<br>GCGAAACGTATTG-3'               |
| pCAMBIA1307-C<br>SAat1A <sup>D219A</sup> -flag                               | 5'-CAATACGTTTCTGGGCCATT<br>AGACGGGCTGGT-3'             | 5'-ACCAGCCCGTCTAATGGCC<br>CAGAAACGTATTG-3'               |
| pCAMBIA1307-C<br>SAat1A <sup>R221A</sup> -flag                               | 5'-CTGGGACATTGCACGGGCT<br>GGTTGTTTCCGTG-3'             | 5'-CACGGAAACAACCAGCCC<br>GTGCAATGTCCCAG-3'               |
| pCAMBIA1307-C<br>SAat1A <sup>L206AD212A</sup> -f<br>lag                      | 5'-TGGGTTGCGTATACTGGGG<br>GTTGTGCTGGTGCAATACGT-3<br>,  | 5'-ACGTATTGCACCAGCACAA<br>CCCCAGTATACGCAACCCA-3<br>,     |
| pCAMBIA1307-C<br>SAat1A <sup>D212AW218A</sup><br>-flag                       | 5'-GGTTGTGCTGGTGCAATAC<br>GTTTCGCGGACATTAGACG-3'       | 5'-CGTCTAATGTCCGCGAAAC<br>GTATTGCACCAGCACAAACC-3'        |
| pCAMBIA1307-C<br>SAat1A <sup>D212AD219A</sup><br>-flag                       | 5'-GTTGTGCTGGTGCAATACG<br>TTTCTGGGCCATTAGACGG-3'       | 5'-CCGTCTAATGGCCAGAAA<br>CGTATTGCACCAGCACAAAC-3'         |
| pCAMBIA1307-C<br>SAat1A <sup>D212AR221A</sup><br>-flag                       | 5'-GTTGTGCTGGTGCAATACG<br>TTTCTGGGACATTGCACGGGC<br>-3' | 5'-GCCCCGTGCAATGTCCCAGA<br>AACGTATTGCACCAGCACAAAC<br>-3' |
| pCAMBIA1307-C<br>SAat1A <sup>D212AW218A</sup><br><sup>D219A</sup> -flag      | 5'-GGTTGTGCAGGTGCAATAC<br>GTTTCGCGGCCATTAGACGG-<br>3'  | 5'-CCGTCTAATGGCCGCGAAA<br>CGTATTGCACCTGCACAACC-3<br>,    |
| pCAMBIA1307-C<br>SAat1A <sup>W218AD219A</sup><br><sup>R221A</sup> -flag      | 5'-GCAATACGTTTCGCGGCCA<br>TTGCACGGGCTGGTTGT-3'         | 5'-ACAACCAGCCCGTGCAATG<br>GCCGCGAAACGTATTGC-3'           |
| pCAMBIA1307-C<br>SAat1A <sup>D212AW218A</sup><br><sup>D219AR221A</sup> -flag | 5'-TGTGCAGGTGCAATACGTT<br>TCGCGGCCATTGCACGGGCT-<br>3'  | 5'-AGCCCGTGCAATGGCCGCG<br>AAACGTATTGCACCTGCACA-3<br>,    |
| pCAMBIA1307-C<br>SAat1A-R1 -flag                                             | 5'-CGAGCTCATGTGGGAGGCT<br>ATCAAAGAC-3'                 | 5'-CGCGGATCCAGTAGACCAT<br>TCCACTGACA-3'                  |
| pCAMBIA1307-C<br>SAat1A-R2 -flag                                             | 5'-CGAGCTCATGTCCAGCGAG<br>TGGGTTTTGTA-3'               | 5'-CGCGGATCCTCCAGGGTGA<br>ATTCTCTTCT-3'                  |

|                                                                              |                                                        |                                                         |
|------------------------------------------------------------------------------|--------------------------------------------------------|---------------------------------------------------------|
| pCAMBIA1307-C<br>SAat1A-R3 -flag                                             | 5'-CGAGCTCATGATGTTATCTA<br>CTCTAGATCG-3'               | 5'-CGCGGATCCGTCGCTCCAA<br>TTGTCTTTATC-3'                |
| pCAMBIA1307-C<br>SAat1B-flag                                                 | 5'-CGAGCTCATGTGGAAGGCT<br>TTTAAAGACAG-3'               | 5'-ACGCGTCGACGTCGCTCCA<br>GTTGTCTTTAT-3'                |
| pCAMBIA1307-C<br>SAat1B <sup>L206A</sup> -flag                               | 5'-TCCAGCGAGTGGGTTGCGT<br>ATACTGGGGGGTG-3'             | 5'-CACCCCCAGTATACGCAA<br>CCCCTCGCTGGA-3'                |
| pCAMBIA1307-C<br>SAat1B <sup>T208A</sup> -flag                               | 5'-GGGTTTTGTATGCTGGGGG<br>GTGTGATGGTGCA-3'             | 5'-TGCACCATCACACCCCCCA<br>GCATACAAAACCC-3'              |
| pCAMBIA1307-C<br>SAat1B <sup>D212A</sup> -flag                               | 5'-ACTGGGGGGTGTGCTGGT<br>GCAATACGTTTCTG-3'             | 5'-CAGAAACGTATTGCACCAG<br>CACACCCCCAGT-3'               |
| pCAMBIA1307-C<br>SAat1B <sup>R216A</sup> -flag                               | 5'-TGTGATGGTGCAATAGCAT<br>TCTGGGACATC-3'               | 5'-GATGTCCCAGAATGCTATTG<br>CACCATCACA-3'                |
| pCAMBIA1307-C<br>SAat1B <sup>W218A</sup> -flag                               | 5'-CAATACGTTTCGCGGACAT<br>CAGACGTGCTGGT-3'             | 5'-ACCAGCACGTCTGATGTCC<br>GCGAAACGTATTG-3'              |
| pCAMBIA1307-C<br>SAat1B <sup>D219A</sup> -flag                               | 5'-CAATACGTTTCTGGGCCAT<br>CAGACGTGCTGGA-3'             | 5'-TCCAGCACGTCTGATGGCC<br>CAGAAACGTATTG-3'              |
| pCAMBIA1307-C<br>SAat1B <sup>R221A</sup> -flag                               | 5'-CTGGGACATCGCACGTGCT<br>GGATGTTTCCGTG-3'             | 5'-CACGGAAACATCCAGCACG<br>TGCGATGTCCCAG-3'              |
| pCAMBIA1307-C<br>SAat1B <sup>L206AD212A</sup> -f<br>lag                      | 5'-TGGGTTGCGTATACTGGGG<br>GGTGTGCTGGTGAATACGT-3<br>,   | 5'-ACGTATTGCACCAGCACAC<br>CCCCAGTATACGCAACCCA-3<br>,    |
| pCAMBIA1307-C<br>SAat1B <sup>D212AW218A</sup><br>-flag                       | 5'-GGTGTGCTGGTGAATACG<br>TTTCGCGGACATCAGACG-3'         | 5'-CGTCTGATGTCCGCGAAAC<br>GTATTGCACCAGCACACC-3'         |
| pCAMBIA1307-C<br>SAat1A <sup>D212AD219A</sup><br>-flag                       | 5'-GTGTGCTGGTGAATACGT<br>TTCTGGGCCATCAGACGTGC-<br>3'   | 5'-GCACGTCTGATGGCCCAGA<br>AACGTATTGCACCAGCACAC-3<br>,   |
| pCAMBIA1307-C<br>SAat1B <sup>D212AR221A</sup><br>-flag                       | 5'-GTGTGCTGGTGAATACGT<br>TTCTGGGACATCGCACGTGCT<br>G-3' | 5'-CAGCACGTGCGATGTCCCA<br>GAAACGTATTGCACCAGCACA<br>C-3' |
| pCAMBIA1307-C<br>SAat1B <sup>D212AW218A</sup><br><sup>D219A</sup> -flag      | 5'-GTGTGCTGGTGAATACGT<br>TTCGCGGCCATCAGACGTGCT<br>G-3' | 5'-CAGCACGTCTGATGGCCGC<br>GAAACGTATTGCACCAGCACA<br>C-3' |
| pCAMBIA1307-C<br>SAat1B <sup>W218AD219A</sup><br><sup>R221A</sup> -flag      | 5'-GTGTGATGGTGAATACGT<br>TTCGCGGCCATCGCACGTGCT<br>G-3' | 5'-CAGCACGTGCGATGGCCGC<br>GAAACGTATTGCACCATCACA<br>C-3' |
| pCAMBIA1307-C<br>SAat1B <sup>D212AW218A</sup><br><sup>D219AR221A</sup> -flag | 5'-GTGTGCTGGTGAATACGT<br>TTCGCGGCCATCGCACGTGCT<br>G-3' | 5'-CAGCACGTGCGATGGCCGC<br>GAAACGTATTGCACCAGCACA<br>C-3' |
| pCAMBIA1307-C<br>SAat1B-R1 -flag                                             | 5'-CGAGCTCATGTGGAAGGCT<br>TTTAAAGACAG-3'               | 5'-ACGCGTCGACAGTAGACCA<br>TTCCACTGACA-3'                |
| pCAMBIA1307-C                                                                | 5'-CGAGCTCATGTCCAGCGAG                                 | 5'-ACGCGTCGACTCCAGGGTG                                  |

|                 |                         |                        |
|-----------------|-------------------------|------------------------|
| SAat1B-R2 -flag | TGGGTTTTGTA-3'          | AATTCTCTTCT-3'         |
| pCAMBIA1307-C   | 5'-CGAGCTCATGATGTTATCTA | 5'-ACGCGTCGACGTCGCTCCA |
| SAat1B-R3 -flag | CTCTAGATCG-3'           | GTTGTCTTTAT-3'         |

**Supplemental Table 3. Primers used for yeast two-hybrid assay**

| <b>Plasmids</b>       | <b>Forward Primers</b>                   | <b>Reverse Primers</b>                   |
|-----------------------|------------------------------------------|------------------------------------------|
| pGADT7-CSA<br>at1A-R1 | 5'-CGCGGATCCATGTGGGAGG<br>CTATCAAAGAC-3' | 5'-CGAGCTCTCAAGTAGACCAT<br>TCCACTGACA-3' |
| pGADT7-CSA<br>at1A-R2 | 5'-CGCGGATCCATGTCCAGCGAGT<br>GGGTTTTG-3' | 5'-CGAGCTCTCATCCAGGGTGA<br>ATTCTTCT-3'   |
| pGADT7-CSA<br>at1A-R3 | 5'-CGCGGATCCATGATGTTATCTAC<br>TCTAGAT-3' | 5'-CGAGCTCTCAGTCGCTCCAA<br>TTGTCTTAT-3'  |
| pGADT7-CSA<br>at1B-R1 | 5'-TCCCCGGGATGTGGAAGGCTT<br>TTAAAGAC-3'  | 5'-CGAGCTCTCAAGTAGACCAT<br>TCCACTGACA-3' |
| pGADT7-CSA<br>at1B-R2 | 5'-TCCCCGGGATGTCCAGCGAGT<br>GGGTTTTG-3'  | 5'-CGAGCTCTCATCCAGGGTGA<br>ATTCTTCT-3'   |
| pGADT7-CSA<br>at1B-R3 | 5'-TCCCCGGGATGATGTTATCTAC<br>TCTAGAT-3'  | 5'-CGAGCTCATAAAGACA<br>GGAGCGACTGA-3'    |
